# Supplementary material for: Preoperative short-course radiation therapy with PROtons compared to photons in high-risk RECTal cancer (PRORECT): Initial dosimetric experience
Source: Clin Transl Radiat Oncol. 2022 Dec 17;39:100562. doi: 10.1016/j.ctro.2022.100562 (PMC9792362; doi:10.1016/j.ctro.2022.100562)
Supplement: Supplementary data 3 [file mmc3.pdf]

| Subsites 1-4 are mandatory, additional subsites added depending on tumor features and patient features<br>Modified from Valentini et al, PMID 27528121 and Ng et al, PMID 22401917<br>Isotropic CTVN is delineated on MR<br>OAR: S1-S2, bladder, bowel bag, femoral heads. <b>OARs are delineated on MR, bowel bags delineated on CT.</b> PTV is added by a physicist |                                                                                                                                                                                                                                                                                                                                                                                                                                     |                                                                                                                                                                                                                      | PRORECT                                                                                                                                                                |  |
|-----------------------------------------------------------------------------------------------------------------------------------------------------------------------------------------------------------------------------------------------------------------------------------------------------------------------------------------------------------------------|-------------------------------------------------------------------------------------------------------------------------------------------------------------------------------------------------------------------------------------------------------------------------------------------------------------------------------------------------------------------------------------------------------------------------------------|----------------------------------------------------------------------------------------------------------------------------------------------------------------------------------------------------------------------|------------------------------------------------------------------------------------------------------------------------------------------------------------------------|--|
| Subsite                                                                                                                                                                                                                                                                                                                                                               | Limits CTVN<br>7-8 mm marginal to vessels minus bone/muscle if not stated otherwise                                                                                                                                                                                                                                                                                                                                                 | Limits ITVN                                                                                                                                                                                                          | Recommendations:                                                                                                                                                       |  |
| 1 Primary tumor                                                                                                                                                                                                                                                                                                                                                       | 15 mm marginal from GTVT to CTVT or zCTVT                                                                                                                                                                                                                                                                                                                                                                                           |                                                                                                                                                                                                                      | Mandatory                                                                                                                                                              |  |
| 2 Presakral subsite, pelvic part                                                                                                                                                                                                                                                                                                                                      | <b>Cranial limit:</b> bifurcation a. iliaca ext/int or promotory<br><b>Caudal limit:</b> caudal limit mesorectum                                                                                                                                                                                                                                                                                                                    |                                                                                                                                                                                                                      | Mandatory<br>Consider lowering cranial limit to S2-S3 if $\leq T3$ , N0, MRF- and non-high T.*<br>Always at least 20 mm from cranial limit GTVT to cranial limit CTVN. |  |
| 3 Mesorectum                                                                                                                                                                                                                                                                                                                                                          | <b>Cranial limit:</b> rectosigmoidal junction<br><b>Caudal limit:</b> insertion of the m. levator ani into the external sphincter (disappearing of the mesorectal fat)<br><b>Posterior limit:</b> presacral subsite until beginning of fossa ischiorectalis<br>Mesorectal fascia in other directions                                                                                                                                | Isotropic CTV: Anteriorly add up to 10 mm to account for bladder filling variations. Consider the same if T4 is adjacent to uterus/vesicles. Posteriorly, in low T, account for pitching of the pelvis and add 5 mm. | Mandatory                                                                                                                                                              |  |
| 4 Lateral lymphatic nodes, a. iliaca interna subsite (situated laterally of mesorectum and presacral subsite)                                                                                                                                                                                                                                                         | <b>Cranial limit:</b> bifurcation a. iliaca externa/interna<br><b>Caudal limit:</b> insertion of the m. levator ani into the external sphincter (disappearing of the mesorectal fat)<br><b>Anterior limit:</b> 7-8 mm around vessels in the upper pelvis. Mid pelvis: up to external vessels. Lower pelvis: approximately middle of m obturatorius<br><b>Lateral limit:</b> m iliopsoas, m piriformis, m obturatorius int and bone. |                                                                                                                                                                                                                      | Mandatory<br>Consider lowering cranial limit to S2-S3 if $\leq T3$ , N0, MRF- and non-high T.*<br>Always at least 20 mm from cranial limit GTVT to cranial limit CTVN. |  |
| 5 Lateralt lymphatic nodes, obturator subsite (small volume)                                                                                                                                                                                                                                                                                                          | <b>Cranial limit:</b> 5 mm above canalis obturatorius<br><b>Caudal limit:</b> canalis obturatorius<br><b>Anterior limit:</b> widest part of femoral head<br><b>Medial limit:</b> bladder                                                                                                                                                                                                                                            |                                                                                                                                                                                                                      | Include in case of:<br>Positive nodes in the a iliaca interna subsite, T4, N2<br>T below the peritoneal fold                                                           |  |

|                                                                   |                                                                                                                                                                                                                                         |  |                                                                                                                                                                                                                                                                                                                                                |
|-------------------------------------------------------------------|-----------------------------------------------------------------------------------------------------------------------------------------------------------------------------------------------------------------------------------------|--|------------------------------------------------------------------------------------------------------------------------------------------------------------------------------------------------------------------------------------------------------------------------------------------------------------------------------------------------|
| <b>6</b> Lateral lymphatic nodes, a.iliaca externa subsite        | <b>Cranial limit:</b> bifurcation a iliaca externa/interna<br><b>Caudal limit:</b> between roof of acetabulum and ramus pubis superior<br><b>Anterior limit:</b> 15 mm anterolaterally along the m iliopsoas                            |  | Infiltration of anterior organs, i.e prostate, vesicles, uterus, bladder, vagina or positive nodes in the obturator- or inguinal subsites                                                                                                                                                                                                      |
| <b>7</b> Sphincter                                                | <b>Cranial limit:</b> Anorectal junction→entire sphincter included                                                                                                                                                                      |  | Infiltration of sphincter/analcanal                                                                                                                                                                                                                                                                                                            |
| <b>8</b> Fossa ischiorectalis (FIR)                               | Triangel of adipose tissue limited by levator ani, m obturatorius and m gluteus, posteriorly until m gluteus "turns".<br><b>Caudal limit:</b> anal verge (sphincter included) in a plane of tuberositas ishii                           |  | Infiltration of external sphincter, levators or fossa ischiorectalis                                                                                                                                                                                                                                                                           |
| <b>9</b> Inguinal lymphatic nodes. Pars profunda et superficialis | <b>Cranial limit:</b> where the external vessels leave the pelvis<br><b>Caudal limit:</b> tuberositas ishii<br><b>Anteromedial limit:</b> at least 20 mm, include visible nodes/lymphocoele<br><b>Posterior limit:</b> adjacent muscles |  | Include in case of:<br>Positive inguinal nodes, infiltration below linea dentata, massiv infiltration of the external sphincter or infiltration of lower vagina                                                                                                                                                                                |
| <b>10</b> Iliaca communis subsite                                 | <b>Cranial limit:</b> aortal bifurcation and/or 5 mm above positive nodes<br><b>Caudal limit:</b> bifurcation a iliaca externa/interna                                                                                                  |  | To be included if decided by the tumor board                                                                                                                                                                                                                                                                                                   |
| <b>Explanation to subsite 2 och 4</b>                             |                                                                                                                                                                                                                                         |  | *In accordance to Valentini et al.<br>Consider lowered cranial limit if ≤T3 and non-high T (10-15 cm from anal verge) :<br><br>MFR- with only mesorectala positive nodes: S1/S2 (Syk et al PMID 18495376 )<br>MRF- with N0: S2/S3 (Nijkamp et al PMID 20646849)<br><br>ALWAYS at least 20 mm from cranial limit<br>GTVT to cranial limit CTVN. |
